# Supplementary material for: Validation of Appropriate Reference Genes for qRT–PCR Normalization in Oat (Avena sativa L.) under UV-B and High-Light Stresses
Source: MDPI journal article supplement (doi:10.3390/ijms231911187), 2022-09-23
Supplement: s1 [file s1]

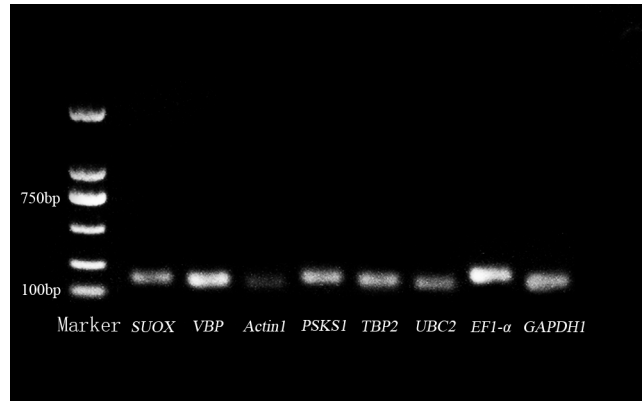

**Figure S1:** PCR amplified products of eight candidate reference genes. Marker: DL2000;

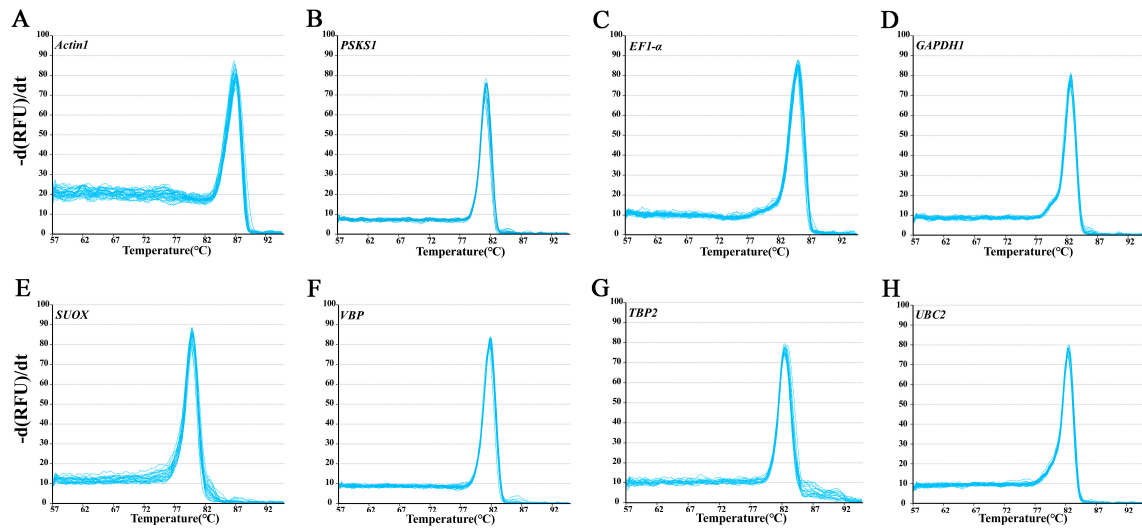

**Figure S2:** Melting curve analysis of eight candidate reference genes.
